# Supplementary material for: Insensitive nitrogen-rich compounds with a planar 2D configuration based on an imidazole–tetrazole
Source: Royal Society of Chemistry journal article supplement (doi:10.1039/d2ce01405j), 2022-01-01
Supplement: d2ce01405j1.pdf [file d2ce01405j1.pdf]

## **Insensitive nitrogen-rich compounds with a planar 2D configuration based on imidazole-tetrazole**

Feng Yang, ‡<sup>a</sup> Yaqi Qin, ‡<sup>a</sup> Yuangang Xu, <sup>\*a</sup> Pengcheng Wang, <sup>a</sup> Qiuhan Lin, <sup>a</sup> and Ming Lu <sup>\*a</sup>

a. School of Chemistry and Chemical Engineering, Nanjing University of Science and Technology

\*Corresponding author. Email address: yuangangxu@163.com (Yuangang Xu) and luming302@126.com (Ming Lu)

### **Content**

1. Crystallographic data of NABTI and **4**
  2. IR and NMR spectra
  3. The calculation section
- Reference

## 1 Crystallographic data

**Table S1.** Crystallographic data of NABTI·DMSO·H<sub>2</sub>O

| Compound                          | NABTI·DMSO·H <sub>2</sub> O                                                                                     |
|-----------------------------------|-----------------------------------------------------------------------------------------------------------------|
| CCDC number                       | 2102547                                                                                                         |
| Chemical formula                  | C <sub>5</sub> H <sub>4</sub> N <sub>12</sub> O <sub>2</sub> ·C <sub>2</sub> H <sub>6</sub> SO·H <sub>2</sub> O |
| Formula mass                      | 360.35                                                                                                          |
| Crystal system                    | triclinic                                                                                                       |
| Space group                       | P-1                                                                                                             |
| a, b, c [Å]                       | 7.3452(3), 7.7532(4), 13.1160(6)                                                                                |
| α, β, γ [°]                       | 81.172(2), 87.255(2), 80.148(2)                                                                                 |
| Volume [Å <sup>3</sup> ]          | 727.03(6)                                                                                                       |
| Temperature [K]                   | 170                                                                                                             |
| Z                                 | 2                                                                                                               |
| μ [mm <sup>-1</sup> ]             | 0.271                                                                                                           |
| ρ [g cm <sup>-3</sup> ]           | 1.646                                                                                                           |
| F (000)                           | 372.0                                                                                                           |
| θ range [°]                       | 5.392 to 52.84                                                                                                  |
| Index ranges                      | -9 ≤ h ≤ 9; -9 ≤ k ≤ 9; -16 ≤ l ≤ 15                                                                            |
| Reflections collected             | 8362                                                                                                            |
| Independent reflections           | 2956                                                                                                            |
| Data/restraints/parameters        | 2956 / 0 / 226                                                                                                  |
| R1 / wR2 [all data]               | 0.0487 / 0.0910                                                                                                 |
| R1 / wR2 [I > 2σ(I)]              | 0.0361 / 0.0819                                                                                                 |
| Goodness-of-fit on F <sup>2</sup> | 1.048                                                                                                           |

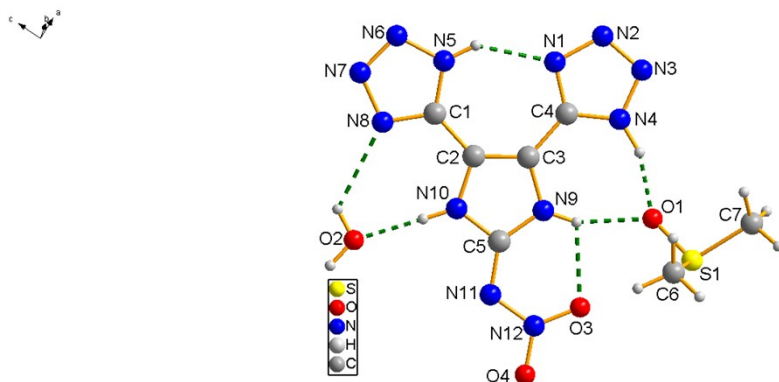

Figure S1. Molecular structure of NABTI·DMSO·H<sub>2</sub>O

**Table S2.** Hydrogen bond of NABTI·DMSO·H<sub>2</sub>O

| D-H···A | d(D-H) | d(H···A) | d(D···A) | <(DHA) |
|---------|--------|----------|----------|--------|
|---------|--------|----------|----------|--------|

|              |         |         |          |           |
|--------------|---------|---------|----------|-----------|
| O2-H2A···N8  | 0.87    | 2.46    | 3.036(2) | 125.00    |
| O2-H2B···O4  | 0.87    | 2.56    | 3.047(2) | 116.00    |
| O2-H2B···N11 | 0.87    | 2.02    | 2.887(2) | 171.00    |
| N4-H4···O1   | 0.96(2) | 1.69(2) | 2.612(2) | 160.00(2) |
| N5-H5···N1   | 0.88    | 2.04    | 2.786(2) | 142.00    |
| N5-H5···N2   | 0.88    | 2.44    | 3.044(2) | 126.00    |
| N9-H9···O1   | 0.88    | 1.91    | 2.737(2) | 157.00    |
| N9-H9···O3   | 0.88    | 2.13    | 2.595(2) | 112.00    |
| N10-H10···O2 | 0.88    | 1.80    | 2.684(2) | 179.00    |
| C6-H6A···O4  | 0.98    | 2.27    | 3.199(3) | 158.00    |
| C6-H6B···O3  | 0.98    | 2.59    | 3.552(3) | 167.00    |
| C7-H7B···N6  | 0.98    | 2.61    | 3.367(3) | 135.00    |

Symmetry transformations used to generate equivalent atoms:

# 1-x,-y,-z    # 1-x,1-y,-z    # 1+x,y,z    # 2-x,1-y,1-z  
# x,y,-1+z    # 1+x,y,z

**Table S3.** Crystallographic data of  $4 \cdot \text{H}_2\text{O}$

| Compound                          | $4 \cdot \text{H}_2\text{O}$                                              |
|-----------------------------------|---------------------------------------------------------------------------|
| CCDC number                       | 2096613                                                                   |
| Chemical formula                  | $\text{C}_7\text{H}_{11}\text{N}_{13}\text{O}_2 \cdot \text{H}_2\text{O}$ |
| Formula mass                      | 327.30                                                                    |
| Crystal system                    | triclinic                                                                 |
| Space group                       | P-1                                                                       |
| a, b, c [Å]                       | 6.4345(5), 9.3017(7), 11.9277(9)                                          |
| $\alpha$ , $\beta$ , $\gamma$ [°] | 76.640(2), 84.469(3), 81.237(2)                                           |
| Volume [Å <sup>3</sup> ]          | 685.08(9)                                                                 |
| Temperature [K]                   | 296(2)                                                                    |
| Z                                 | 2                                                                         |
| $\mu$ [mm <sup>-1</sup> ]         | 0.271                                                                     |
| $\rho$ [g cm <sup>-3</sup> ]      | 1.587                                                                     |
| F (000)                           | 340                                                                       |
| $\theta$ range [°]                | 2.271 to 27.506                                                           |
| Index ranges                      | $-8 \leq h \leq 8$ ; $-12 \leq k \leq 12$ ; $-15 \leq l \leq 15$          |
| Reflections collected             | 10334                                                                     |
| Independent reflections           | 3109                                                                      |
| Data/restraints/parameters        | 3109 / 0 / 216                                                            |
| R1 / wR2 [all data]               | 0.0546 / 0.1036                                                           |
| R1 / wR2 [I > 2 $\sigma$ (I)]     | 0.0387 / 0.0953                                                           |

|                                   |                    |
|-----------------------------------|--------------------|
| Compound                          | 4·H <sub>2</sub> O |
| Goodness-of-fit on F <sup>2</sup> | 1.041              |

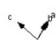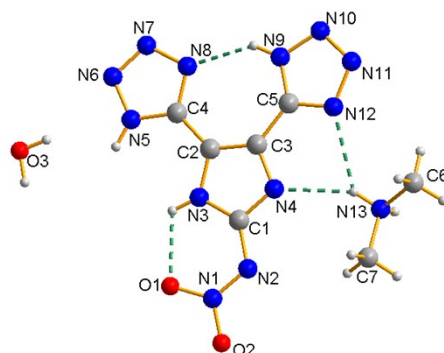

**Figure S2.** Molecular structure of 4·H<sub>2</sub>O

**Table S4.** Hydrogen bond of 4·H<sub>2</sub>O

| D-H···A               | d(D-H)  | d(H...A) | d(D...A)   | <(DHA)    |
|-----------------------|---------|----------|------------|-----------|
| O(3)-H(3B)···N(11) #1 | 0.83(2) | 2.08(2)  | 2.9000(17) | 170(2)    |
| O(3)-H(3A)···N(7) #2  | 0.90(2) | 2.01(2)  | 2.9051(18) | 172.3(19) |
| C(6)-H(6A)···O(2)#3   | 0.96    | 2.62     | 3.468(3)   | 147.0     |
| N(13)-H(13B)···O(3)#4 | 0.89    | 2.50     | 3.0895(18) | 124.5     |
| N(13)-H(13B)···O(3)#5 | 0.89    | 2.03     | 2.8475(17) | 152.1     |
| N(13)-H(13A)···N(12)  | 0.89    | 2.42     | 3.1183(18) | 135.9     |
| N(13)-H(13A)···N(4)   | 0.89    | 2.23     | 3.0325(17) | 149.8     |
| N(9)-H(9)···N(10)#6   | 0.86    | 2.65     | 3.1043(17) | 114.6     |
| N(9)-H(9)···N(8)      | 0.86    | 2.03     | 2.7577(16) | 142.1     |
| N(5)-H(5)···O(2)#7    | 0.86    | 1.94     | 2.6760(16) | 142.8     |
| N(5)-H(5)···O(1)#7    | 0.86    | 2.40     | 3.2143(16) | 158.0     |
| N(5)-H(5)···N(1)#7    | 0.86    | 2.53     | 3.3806(17) | 171.5     |
| N(3)-H(3)···O(1)#7    | 0.86    | 2.08     | 2.9325(15) | 170.5     |
| N(3)-H(3)···O(1)      | 0.86    | 2.13     | 2.5885(15) | 113.0     |

Symmetry transformations used to generate equivalent atoms:

#1 -x+2,-y+1,-z+1    #2 x,y-1,z    #3 x+1,y,z    #4 -x+1,-y+1,-z+1  
 #5 x,y+1,z-1    #6 -x+2,-y+2,-z+1    #7 -x,-y+1,-z+1

## 2 IR and NMR spectrum

**Figure S3** IR spectrum of NABTI.

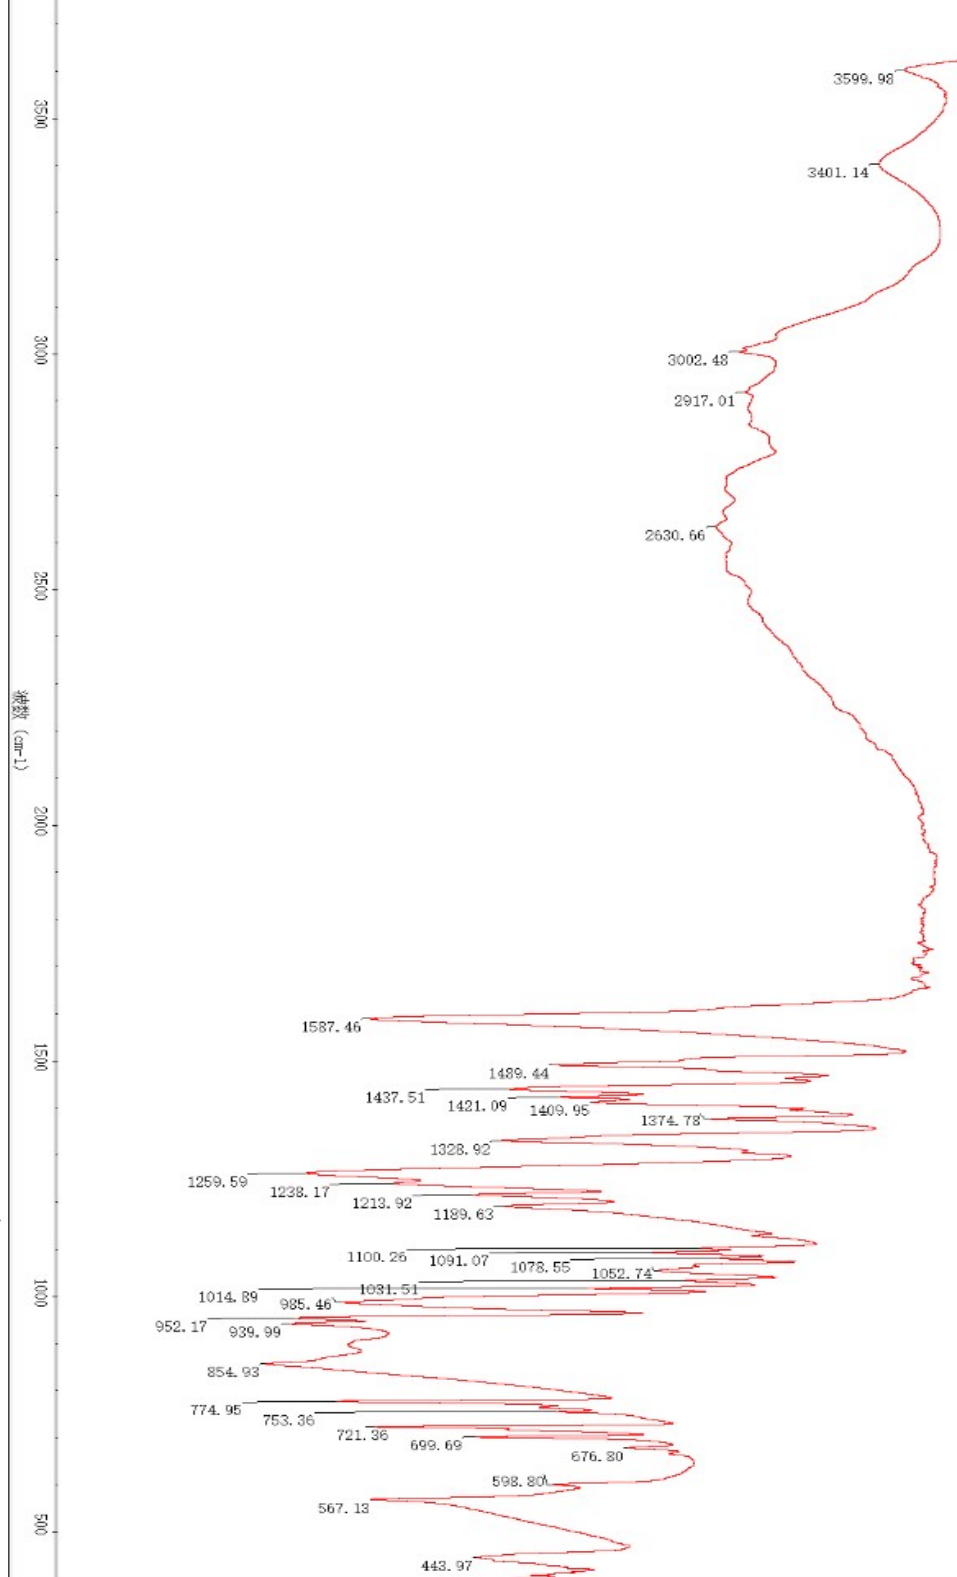

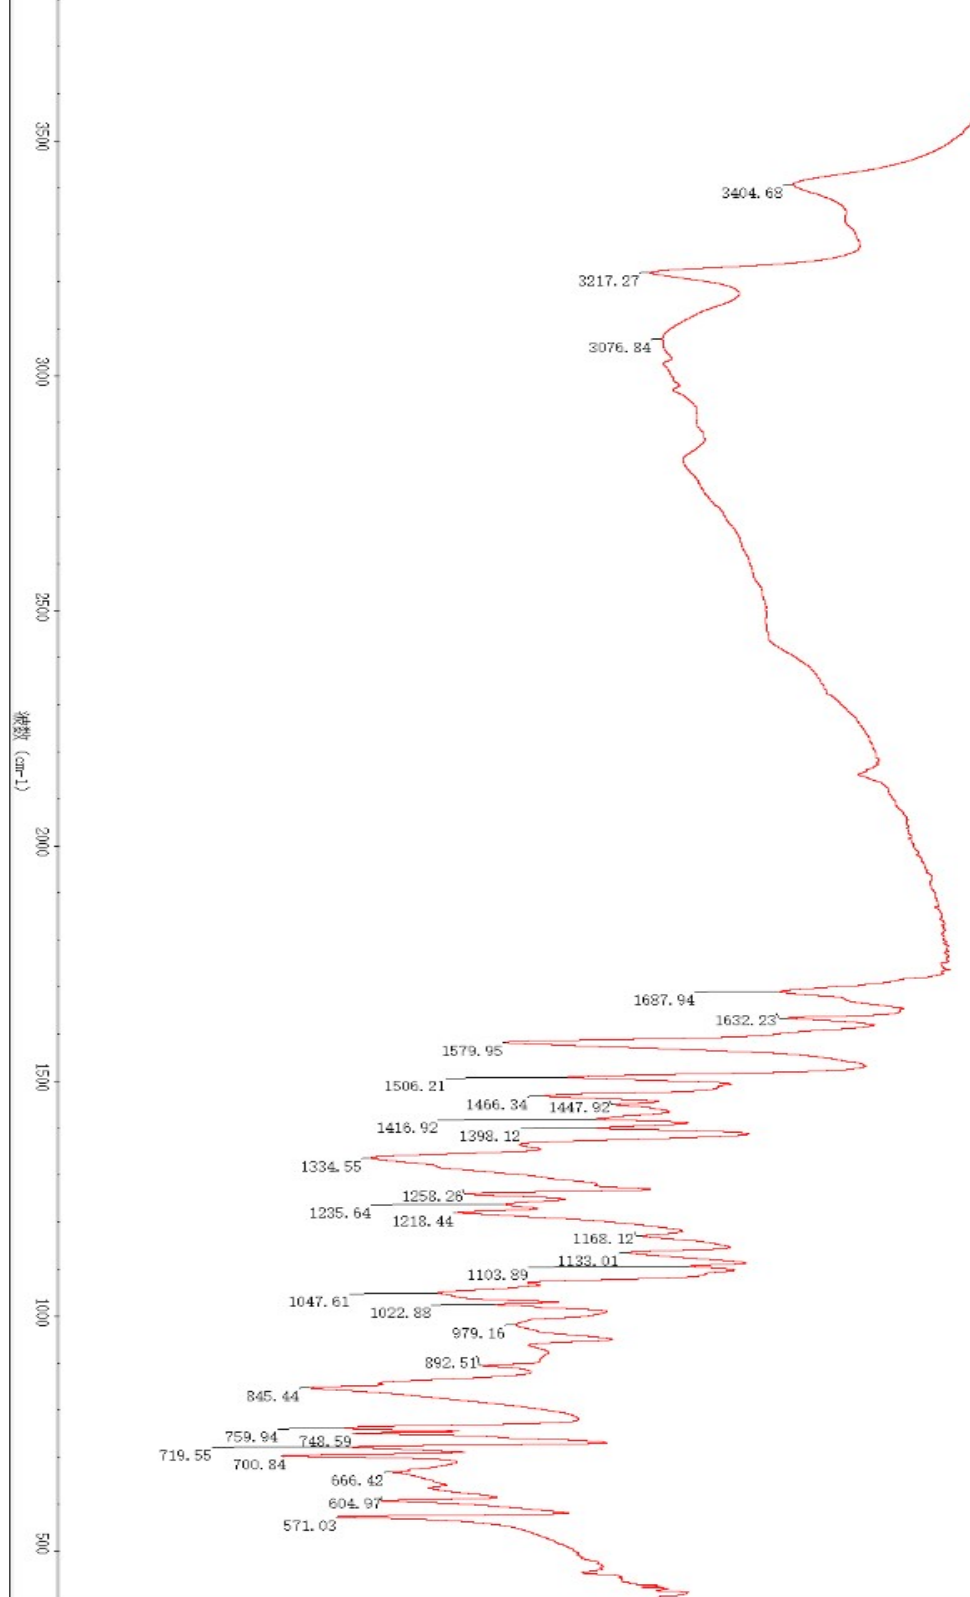

Figure S4. IR spectrum of 4.

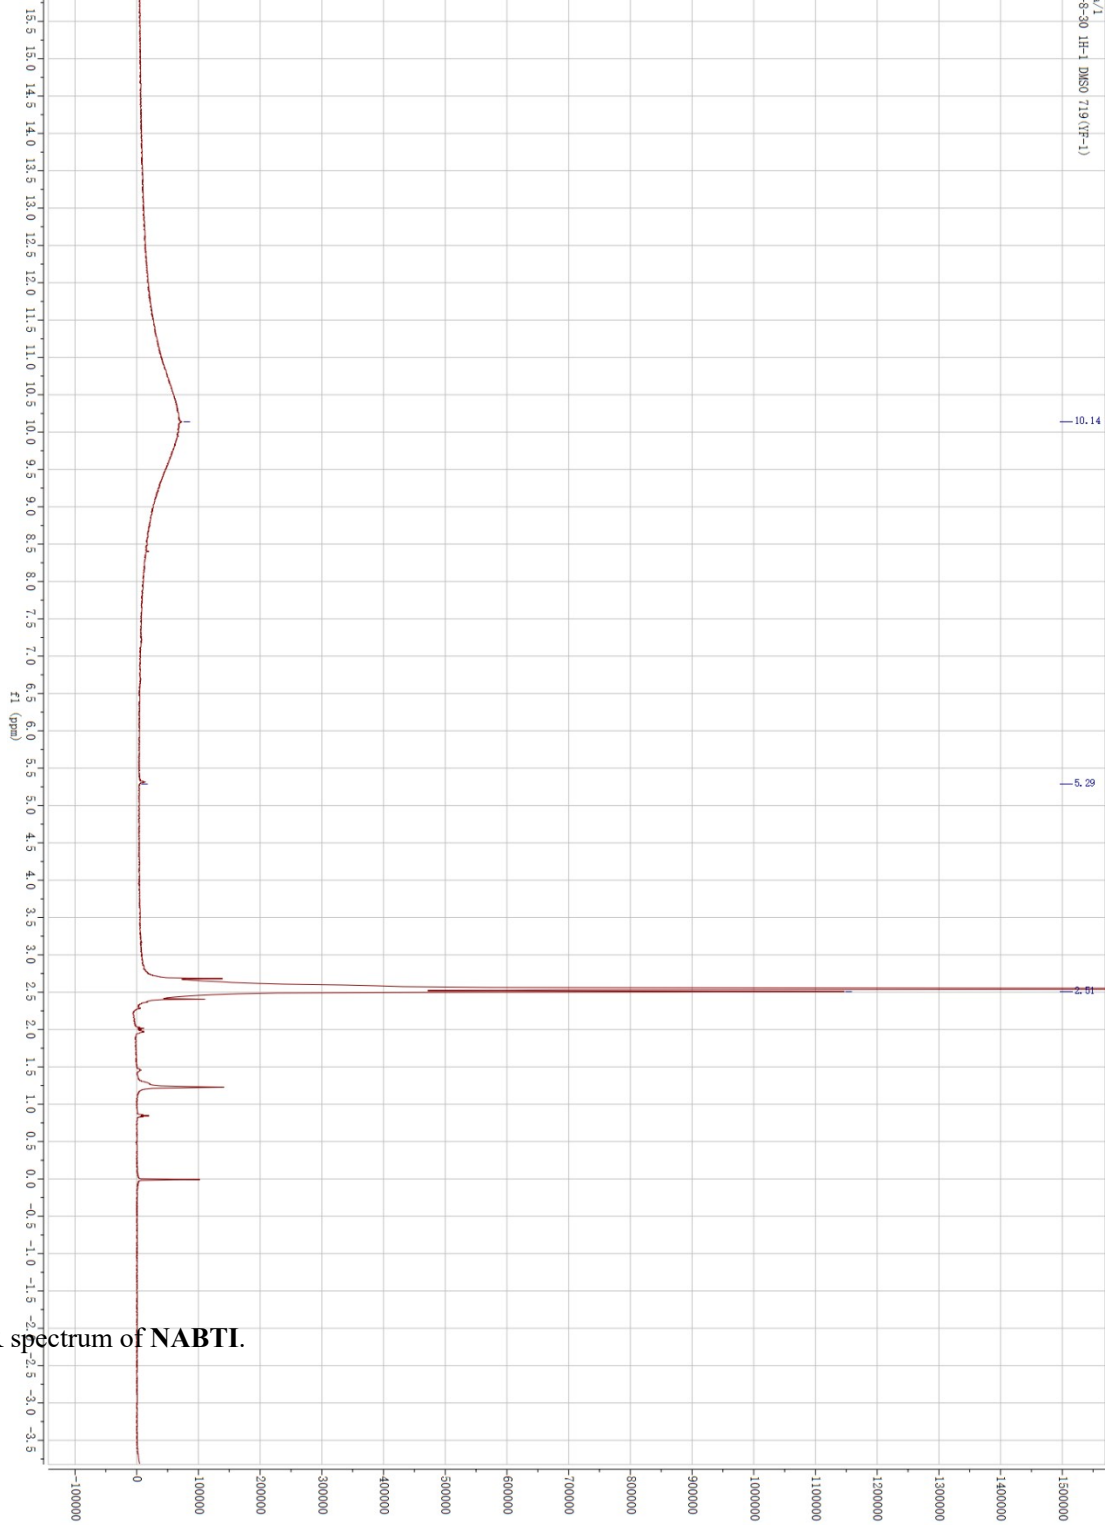

**Figure S5.**  $^1\text{H}$  NMR spectrum of NABTI.

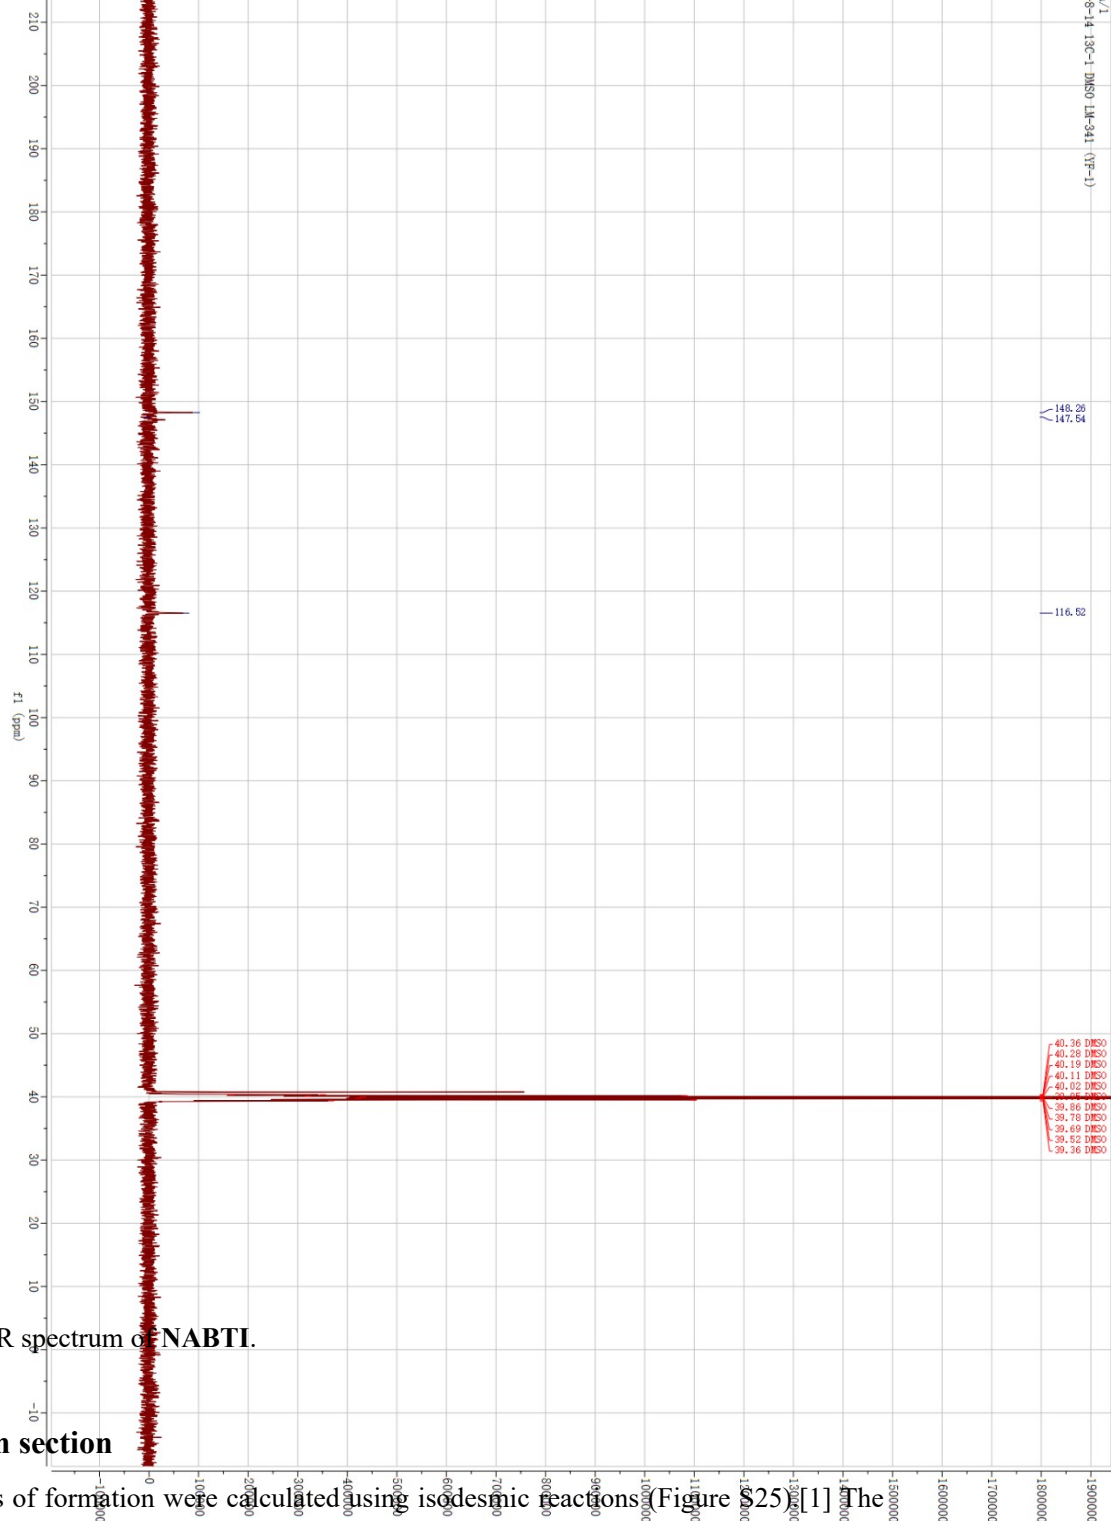

**Figure S6.**  $^{13}\text{C}$  NMR spectrum of NABTI.

### 3 The calculation section

The gas phase heats of formation were calculated using isodesmic reactions (Figure S25)[1] The calculations were carried out using Gaussian 09 suite of programs,[2] at the B3LYP/6-31 G\* level.

And the solid state heats of formation were calculated using the equation 1.[3]

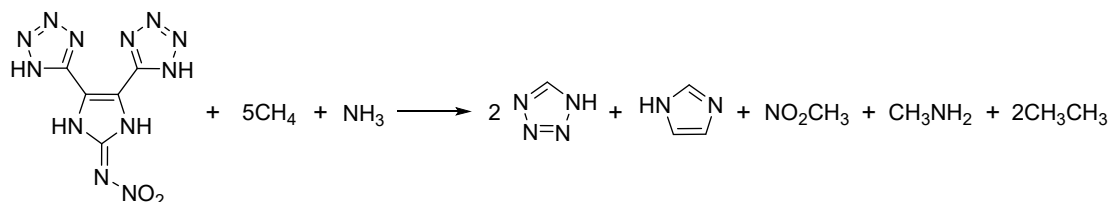

**Figure S7** Isodesmic reaction of compound NABTI.

The enthalpy of sublimation can be represented as eq (1) and on the basis of the predicted electrostatic potential of a molecule.[4]

$$\Delta H_{sub} = a(SA)^2 + b\sqrt{\nu\sigma_{tot}^2} + c \quad (1)$$



Here SA is the surface area of the 0.001 electrons bohr<sup>-3</sup> isosurface of the electronic density of the compounds,  $\nu\sigma_{tot}^2$  is derived from the molecular electrostatic potential calculation, and a, b, c are fitting parameters reported by Politzer et al.[4]

For energetic salts, the solid-phase heats of formation are calculated based on a Born-Haberenergy cycle (Scheme S1).[5]

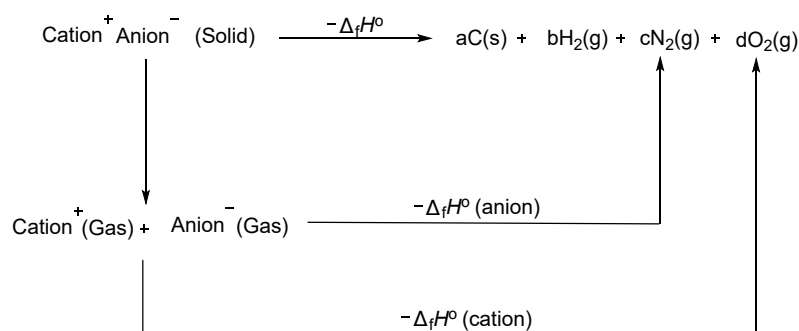

**Scheme S1.** Born-Haber Cycle for the formation of energetic salts.

$$\Delta H_f^\circ (\text{salt}, 298 \text{ K}) = \Delta H_f^\circ (\text{cation}, 298\text{K}) + \Delta H_f^\circ (\text{anion}, 298\text{K}) - \Delta \text{HL} \quad (2)$$

where  $\Delta \text{HL}$  is the lattice energy of the salts, which could be predicted by using the formula suggested by Jenkins et al. [Eq. (3)]

$$\Delta \text{HL} = U_{\text{POT}} + [p(nM/2 - 2) + q(nX/2 - 2)]RT \quad (3)$$

where  $nM$  and  $nX$  represent the nature of the ions,  $Mq^+$  and  $Xp^-$ , and are equal to 3 for monatomic ions, 5 for linear polyatomic ions, and 6 for nonlinear polyatomic ions. The equation for lattice potential energy  $U_{\text{POT}}$  is as the follow:

$$U_{\text{POT}} [\text{kJ mol}^{-1}] = \gamma(\rho m/Mm)^{1/3} + \delta \quad (4)$$

where  $\rho$  (g cm<sup>-3</sup>) is the density of the salt,  $Mm$  is the formula mass of the ionic compound, and values for  $\gamma$  (kJ mol<sup>-1</sup> cm) and  $\delta$  (kJ mol<sup>-1</sup>) are assigned literature values.<sup>8</sup>

**Table S5.** Calculated total energy ( $E_0$ ), zero-point energy ( $ZPE$ ), thermal correction to enthalpy ( $\Delta H_T$ ), and heats of formation ( $HOF$ ) in gas state.

| Compound                                     | $E_0$ / a. u. | $ZPE$ / kJ mol <sup>-1</sup> | $\Delta H_T$ / a. u. | $HOF$ /kJ mol <sup>-1</sup> |
|----------------------------------------------|---------------|------------------------------|----------------------|-----------------------------|
| <b>NABTI</b>                                 | -1000.1936689 | 382.636                      | 0.160791             | 948.61                      |
| CH <sub>4</sub>                              | -40.5240195   | 118.22                       | 0.048836             | -74.60                      |
| NH <sub>3</sub>                              | -56.5479477   | 90.67                        | 0.038336             | -45.87                      |
| <b>NABTI-</b>                                | -999.6875669  | 346.869                      | 0.146956             | 712.07                      |
| NO <sub>2</sub> CH <sub>3</sub>              | -245.0133749  | 131.32                       | 0.055294             | -74.300                     |
| NH <sub>2</sub> CH <sub>3</sub>              | -95.8532042   | 169.15                       | 0.068745             | -23.000                     |
| C <sub>3</sub> N <sub>2</sub> H <sub>4</sub> | -226.2145594  | 187.053                      | 0.075969             | 194.03                      |

|                                             |              |         |          |       |
|---------------------------------------------|--------------|---------|----------|-------|
| CN <sub>4</sub> H <sub>2</sub>              | -258.250899  | 123.259 | 0.051374 | 364.4 |
| C <sub>2</sub> NH <sub>8</sub> <sup>+</sup> | -135.5340286 | 285.179 | 0.114056 | 13.92 |

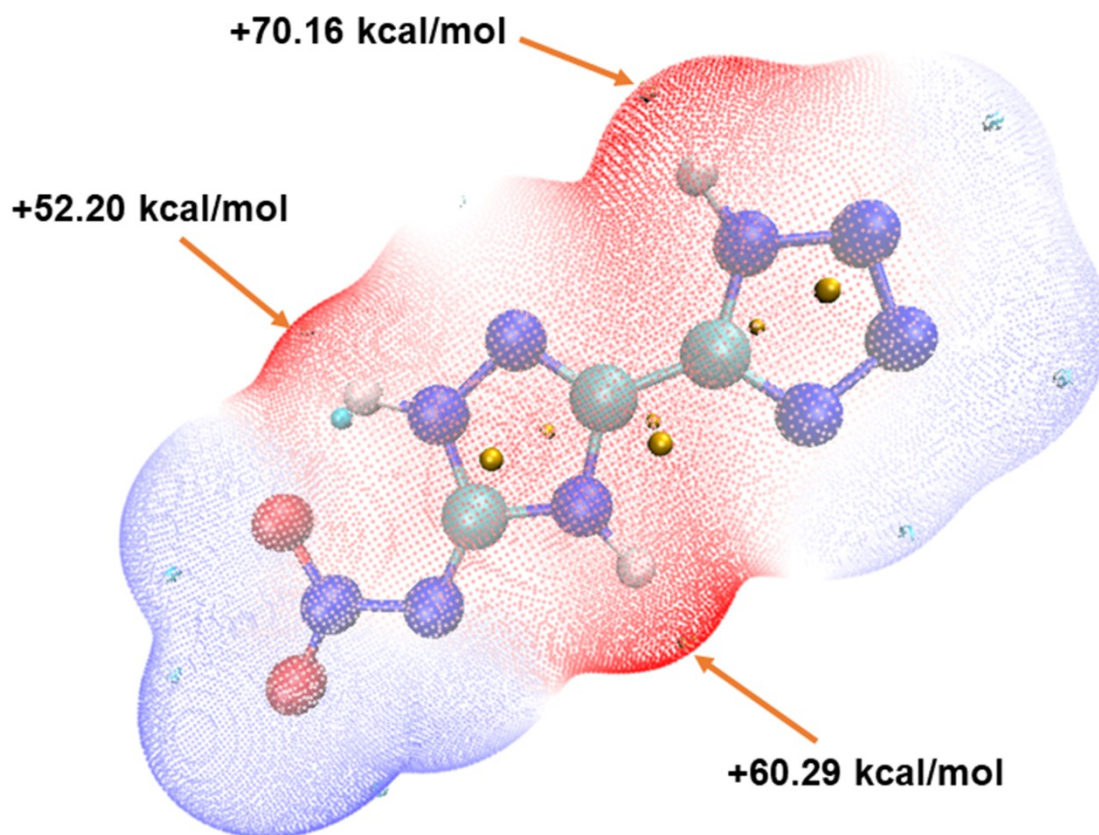

**Figure S8.** The molecular electrostatic potential (positive value) distributions of **NATT**.

### Reference

- (1) J. Zhang, H. D, F. Wang, *et al.* DFT Studies on a High Energy Density Cage Compound 4-Trinitroethyl-2,6,8,10,12-pentanitrohezaazaisowurtzitane. *J. Phys. Chem. A*, 2011, **24**, 6617-6621.
- (2) M. J. Frisch, Gaussian 09. Revision a. 02, Gaussian, Inc., Wallingford CT, 2009.
- (3) P. W. Atkins, Physical Chemistry. Oxford University Press, Oxford, U. K., 1982.
- (4) P. J. Politzer, S. Murray, T. Brinck, P. Lan, Immunoanalysis of agrochemicals. ACS Symposium Series 586, American Chemical Society, Washington, DC, 1994.
- (5) H. D. B. Jenkins, D. Tudela, L. Glasser, Lattice Potential Energy Estimation for Complex Ionic Salts from Density Measurements, *Inorg. Chem.*, 2002, **9**, 2364-2367.
